# Supplementary material for: Genetic background determines severity of Loxl1-mediated systemic and ocular elastosis in mice
Source: PubMed Central journal article supplement (PMC10668029; doi:10.1242/dmm.050392), 2023-11-13
Supplement: dmm-16-050392-s1.pdf [file dmm-16-050392-s1.pdf]

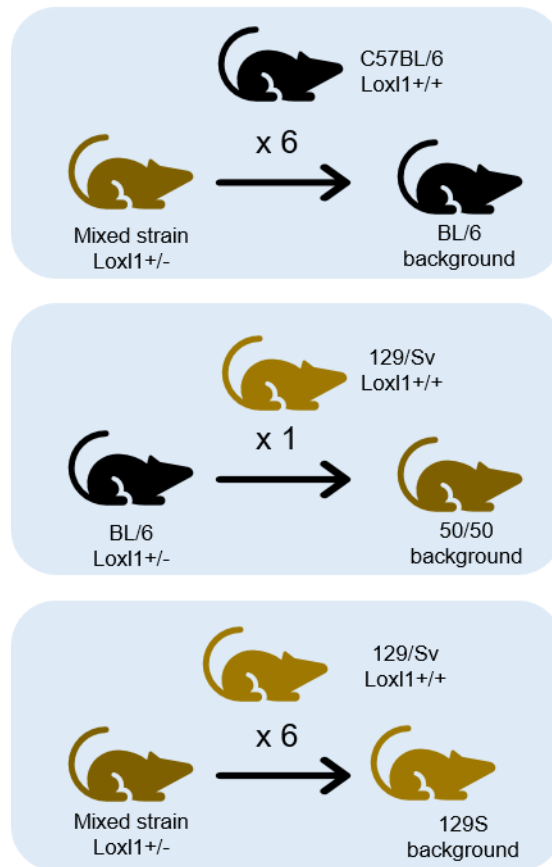

**Fig. S1. Shown is the scheme used for mouse backcrossing.** Mixed 129S.C57BL/6. $Lox1^{+/-}$  mice were backcrossed onto C57BL/6J or 129S1/SvImJ background six times to obtain the BL/6 (upper panel) or 129S (lower panel) background mice. BL/6 mice were backcrossed one time with 129S1/SvImJ, producing the 50/50 strain (middle panel)

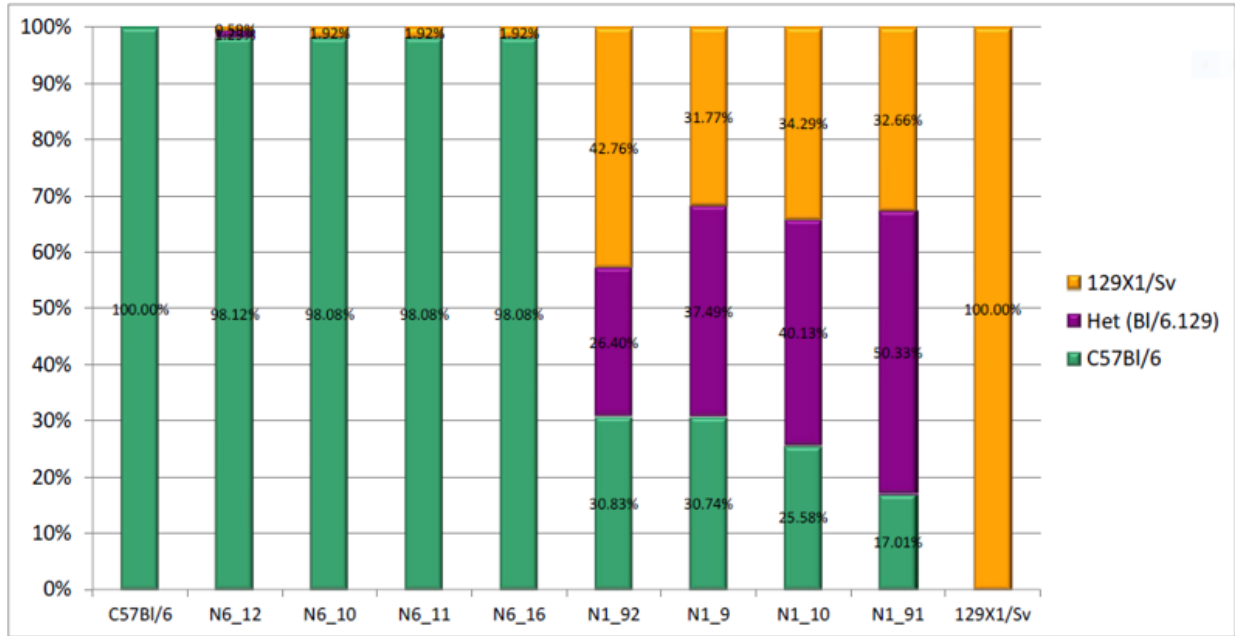

**Fig. S2. Full genotyping of backcrossed BL/6 and 50/50 *Lox11*<sup>+/+, +/-, -/-</sup> mice using DartMouse™ genotyping services (Dartmouth- Geisel School of Medicine).**

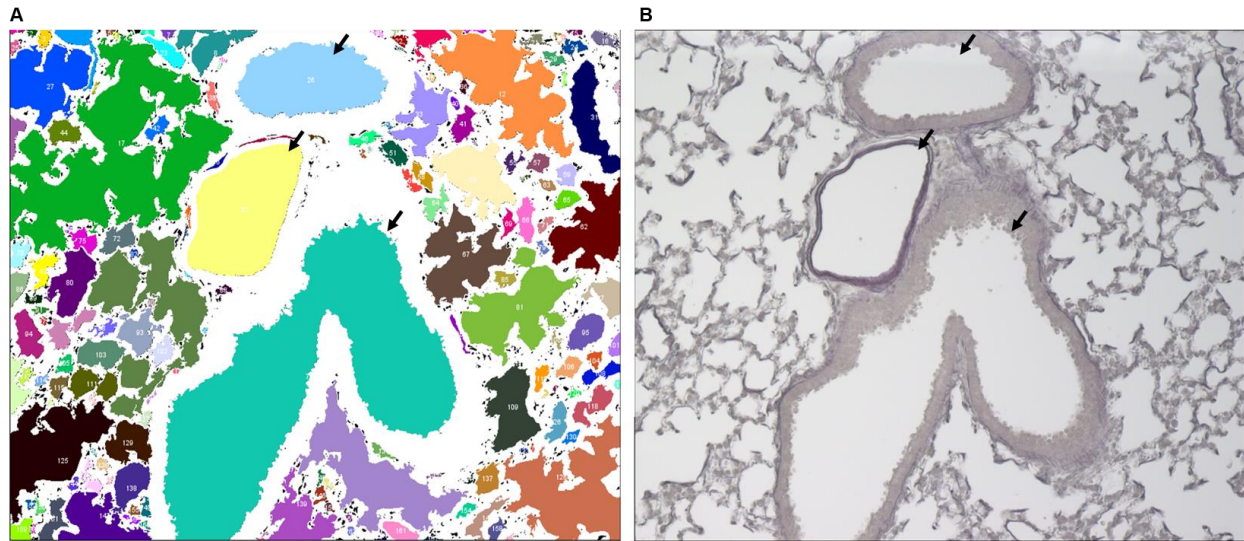

**Fig. S3. Representative image showing lung alveolar space quantification using particle analysis in Fiji.** (A) Each measured space/result has an assigned number (and color) by Fiji. (B) Using the original image as a guide, non-alveolar spaces are excluded from the analysis. (arrows point major vessels that were excluded) (image from a 50/50.*Lox11*<sup>-/-</sup> mouse).

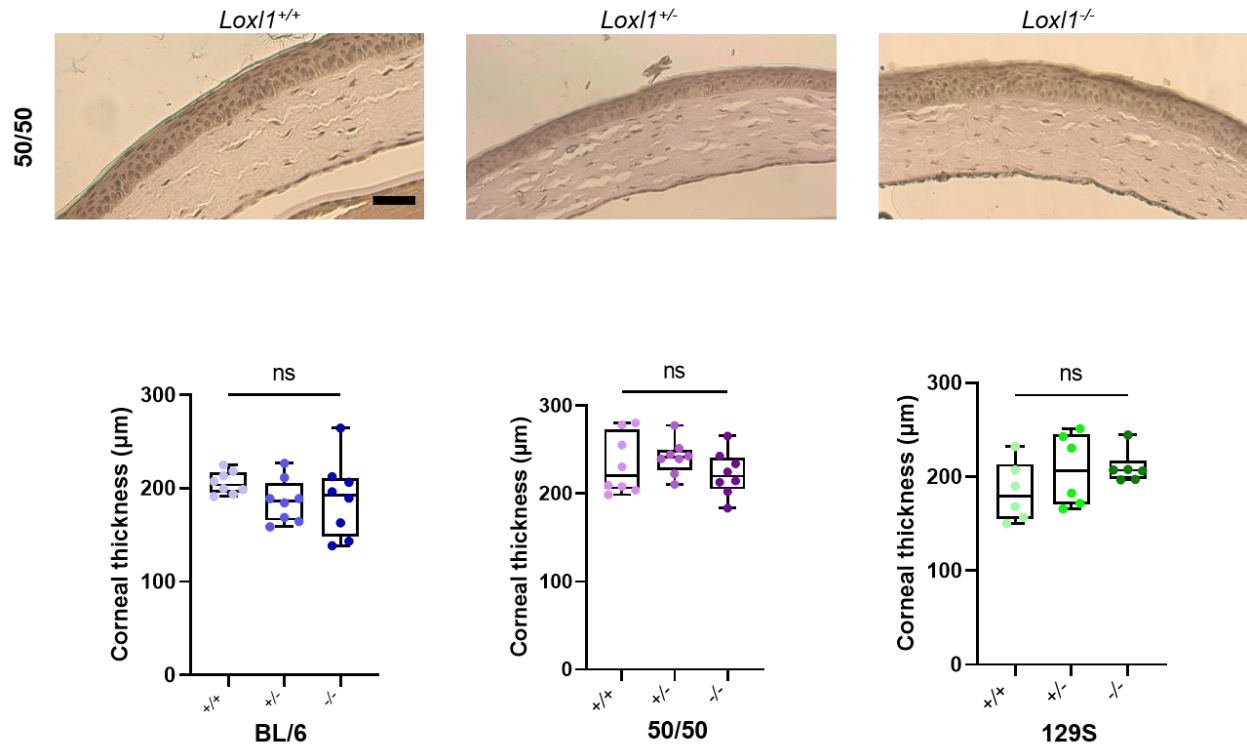

**Fig. S4. Central corneal thickness is not altered in *Lox11* deficient mice.** Upper panel shows representative images from sagittal sections of corneas stained with *Weigert's Resorcin-Fuchsin* stain in 50/50 *Lox11*<sup>+/+</sup>, *Lox11*<sup>+/-</sup> and *Lox11*<sup>-/-</sup> mice. Lower panel: corneal thickness quantification did not show significant changes in the *Lox11*<sup>-/-</sup> mice when compared to the respective *Lox11*<sup>+/+</sup> littermates. Measurements were performed on the central cornea, using the pupil area as a guide (iris' border) (n= 2 sections /3-4 eyes/ mice/genotype/background). Scale bar = 50 µm. Ordinary one-way ANOVA followed by Tukey's multiple comparisons test was used for statistical analysis.

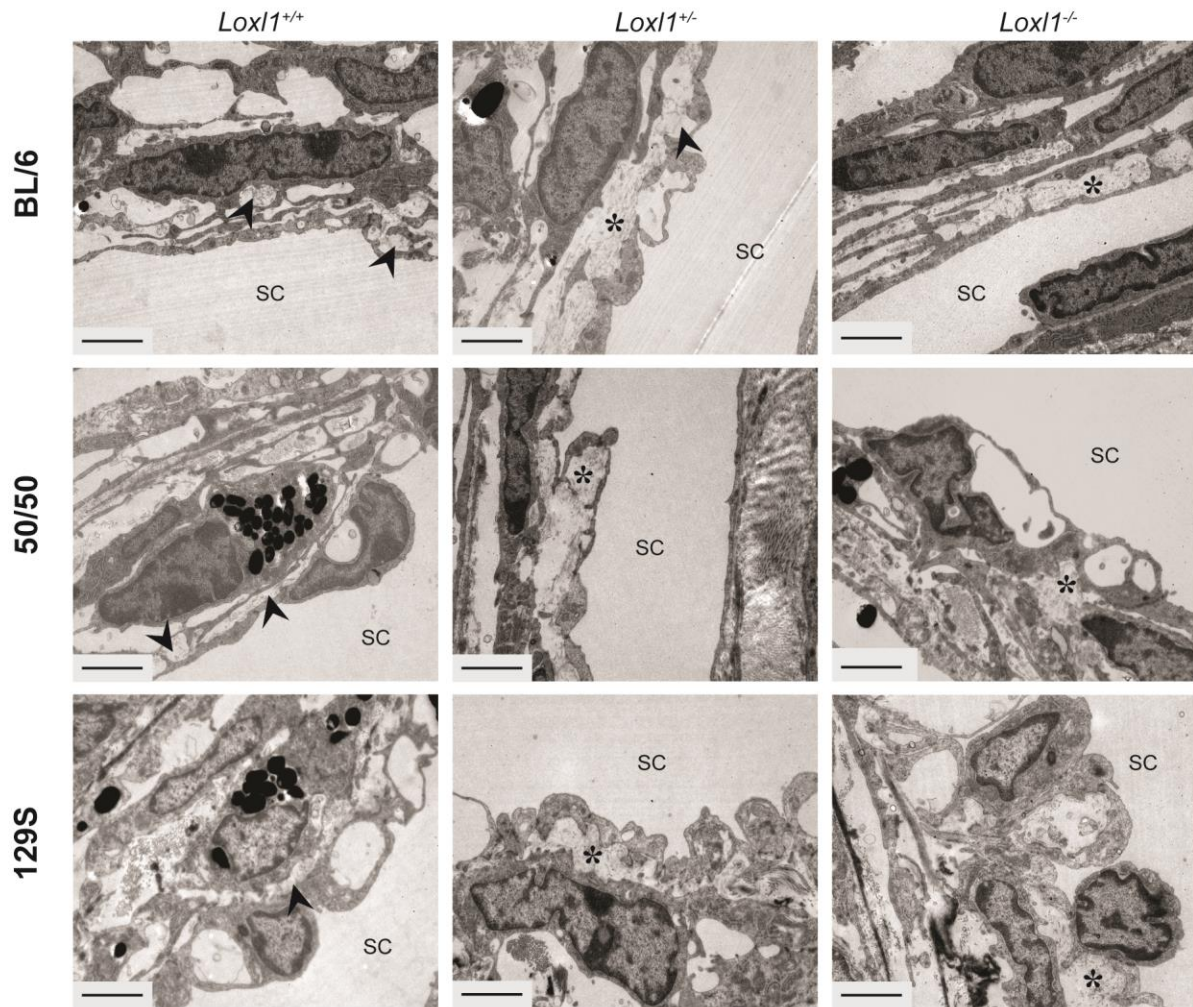

**Fig. S5. Young *Lox11* deficient mice displayed irregular extracellular matrix deposition below the inner wall of Schlemm's canal.** Representative anterior segment ultrathin section images for *Lox11*<sup>+/+</sup>, *Lox11*<sup>+/-</sup> and *Lox11*<sup>-/-</sup> mice from BL/6, 50/50 and 129S background showing discontinuous basal laminal material in *Lox11*<sup>+/+</sup> mice (arrowheads) and more continuous and abundant material in *Lox11*<sup>+/-</sup>, increasing even more in *Lox11*<sup>-/-</sup> mice (\*). SC=Schlemm's canal. (BL/6, 50/50 and 129S, n= 3-5 sections per eye / 4 eyes /genotype). Scale bar = 2  $\mu$ m.
